# Supplementary material for: A Level Set Based Framework for Quantitative Evaluation of Breast Tissue Density from MRI Data
Source: PubMed Central journal article supplement (PMC4244105; doi:10.1371/journal.pone.0112709), 2014-11-25
Supplement: pone.0112709.s001.pdf [file pone.0112709.s001.pdf]

Table S1: Breast Volume (BV) Values, DICE Coefficients, Sensitivity and Specificity Values for 37 Datasets.

| ACR | DICE     | Sensitivity | Specificity | BV Auto (L) | BV Manual (L) | BV Auto (Vx) | BV Manual (Vx) |
|-----|----------|-------------|-------------|-------------|---------------|--------------|----------------|
| 1   | 0.9714   | 0.99        | 0.99        | 3.03836     | 2.92033       | 4593358      | 4414930        |
| 1   | 0.97     | 0.98        | 0.993       | 2.73837     | 2.63748       | 4139839      | 3987315        |
| 1   | 0.9711   | 0.98        | 0.9932      | 2.82172     | 2.71754       | 4265843      | 4108356        |
| 1   | 0.9691   | 0.9844      | 0.9924      | 3.17231     | 3.07488       | 4795867      | 4648566        |
| 1   | 0.9721   | 0.9866      | 0.9937      | 2.89959     | 2.81567       | 4383568      | 4256700        |
| 1   | 0.9711   | 0.9928      | 0.99        | 3.42862     | 3.28158       | 5183342      | 4961065        |
| 1   | 0.9703   | 0.988       | 0.99        | 3.131       | 3.01861       | 4733409      | 4563501        |
| 1   | 0.97796  | 0.98875     | 0.9955      | 2.652       | 2.5947        | 4009281      | 3922643        |
| 1   | 0.9705   | 0.9817      | 0.99125     | 3.9586      | 3.86876       | 5984563      | 5848746        |
| 2   | 0.9677   | 0.9913      | 0.9949      | 1.88665     | 1.79873       | 2852207      | 2719307        |
| 2   | 0.9394   | 0.9947      | 0.996       | 0.705045    | 0.630705      | 1065879      | 953493         |
| 2   | 0.96771  | 0.969       | 0.9972      | 1.688       | 1.68292       | 2552041      | 2544221        |
| 2   | 0.97457  | 0.9911      | 0.9956      | 2.12202     | 2.05231       | 3208039      | 3102668        |
| 2   | 0.97623  | 0.9938      | 0.9952      | 2.33139     | 2.24992       | 3524566      | 3401410        |
| 2   | 20.95887 | 0.98        | 0.9947      | 1.75293     | 1.67652       | 2650058      | 2534543        |
| 2   | 0.982433 | 0.98976     | 0.9946      | 3.97511     | 3.91665       | 6009525      | 5921153        |
| 2   | 0.97728  | 0.9943      | 0.9964      | 1.8618      | 1.79909       | 2814649      | 2719839        |
| 2   | 0.95276  | 0.9581      | 0.989       | 3.79382     | 3.75147       | 5735450      | 5671440        |
| 2   | 0.94     | 0.91        | 0.99        | 3.14845     | 3.32466       | 4759785      | 5026193        |
| 3   | 0.95     | 0.9839      | 0.9943      | 1.4811      | 1.38604       | 2239106      | 2095402        |
| 3   | 0.965    | 0.99        | 0.994       | 1.99603     | 1.89472       | 3017573      | 2864413        |
| 3   | 0.96748  | 0.98        | 0.996       | 1.52197     | 1.45497       | 2300892      | 2199610        |
| 3   | 0.963454 | 0.995       | 0.995       | 1.54088     | 1.44582       | 2329488      | 2185783        |
| 3   | 0.9334   | 0.9668      | 0.99        | 0.71128     | 0.664         | 1075309      | 1003491        |
| 3   | 0.94636  | 0.994       | 0.9887      | 2.32338     | 2.10967       | 3512465      | 3189383        |
| 3   | 0.9431   | 0.9766      | 0.99        | 2.0305      | 1.87862       | 3069679      | 2840075        |
| 3   | 0.95838  | 0.9886      | 0.9971      | 0.877       | 0.825312      | 1326461      | 1247699        |
| 3   | 0.9439   | 0.9968      | 0.99        | 1.12277     | 1.00958       | 1697396      | 1526279        |
| 3   | 0.965537 | 0.989       | 0.989       | 3.43654     | 3.27639       | 5195317      | 4953207        |
| 4   | 0.93     | 0.9788      | 0.9936      | 1.1585      | 1.04554       | 1751403      | 1580631        |
| 4   | 0.9      | 0.9788      | 0.99        | 0.533621    | 0.4474        | 806721       | 676375         |
| 4   | 0.9564   | 0.985       | 0.9957      | 1.33776     | 1.23249       | 2022412      | 1863270        |
| 4   | 0.963    | 0.9804      | 0.9948      | 2.12722     | 2.01113       | 3215900      | 3040391        |
| 4   | 0.9623   | 0.9908      | 0.9933      | 1.60144     | 1.54139       | 2421042      | 2330253        |
| 4   | 0.9715   | 0.996       | 0.992       | 2.77817     | 2.64294       | 4200005      | 3995566        |
| 4   | 0.9303   | 0.9978      | 0.9949      | 0.782       | 0.675684      | 1182252      | 1021492        |
| 4   | 0.9619   | 0.995       | 0.996       | 1.19106     | 1.11353       | 1800625      | 1683422        |
