# Supplementary material for: A Level Set Based Framework for Quantitative Evaluation of Breast Tissue Density from MRI Data
Source: PubMed Central journal article supplement (PMC4244105; doi:10.1371/journal.pone.0112709), 2014-11-25
Supplement: pone.0112709.s002.pdf [file pone.0112709.s002.pdf]

Table S2: Parenchyma Volume (PV) Values, DICE Coefficients, Sensitivity and Specificity Values for 37 Datasets.

| ACR | DICE   | Sensitivity | Specificity | PV Auto (L) | PV Manual (L) | PV Auto (Vx) | PV Manual (Vx) |
|-----|--------|-------------|-------------|-------------|---------------|--------------|----------------|
| 1   | 0.8075 | 0.74        | 0.99        | 0.10        | 0.14          | 155928       | 208291         |
| 1   | 0.77   | 0.73        | 0.99        | 0.08921     | 0.108815      | 134867       | 164506         |
| 1   | 0.73   | 0.84        | 0.99        | 0.165841    | 0.126567      | 250717       | 191342         |
| 1   | 0.754  | 0.7         | 0.99        | 0.076892    | 0.090123      | 116245       | 136247         |
| 1   | 0.684  | 0.65        | 0.99        | 0.053374    | 0.060495      | 80691        | 91457          |
| 1   | 0.81   | 0.75        | 0.99        | 0.140991    | 0.171569      | 213149       | 259376         |
| 1   | 0.79   | 0.77        | 0.99        | 0.140931    | 0.143835      | 213058       | 217448         |
| 1   | 0.8305 | 0.784       | 0.99        | 0.12416     | 0.141587      | 187704       | 214050         |
| 1   | 0.701  | 0.736       | 0.99        | 0.112409    | 0.100071      | 169939       | 151287         |
| 2   | 0.89   | 0.862       | 0.99        | 0.151374    | 0.162598      | 228845       | 245814         |
| 2   | 0.797  | 0.73        | 0.98        | 0.05103     | 0.059081      | 77147        | 89318          |
| 2   | 0.8425 | 0.89        | 0.98        | 0.198101    | 0.173339      | 299497       | 262052         |
| 2   | 0.8718 | 0.872       | 0.997       | 0.236933    | 0.235699      | 358193       | 356328         |
| 2   | 0.84   | 0.77        | 0.99        | 0.131694    | 0.158148      | 199094       | 239087         |
| 2   | 0.77   | 0.69        | 0.99        | 0.060042    | 0.074933      | 90771        | 113284         |
| 2   | 0.8    | 0.84        | 0.996       | 0.218066    | 0.199381      | 329669       | 301422         |
| 2   | 0.87   | 0.829       | 0.99        | 0.123936    | 0.1372        | 187365       | 207417         |
| 2   | 0.77   | 0.83        | 0.99        | 0.210567    | 0.186423      | 318332       | 281832         |
| 2   | 0.81   | 0.91        | 0.990       | 0.192847    | 0.160918      | 291544       | 243275         |
| 3   | 0.9    | 0.867       | 0.99        | 0.181921    | 0.203889      | 275026       | 308238         |
| 3   | 0.823  | 0.79        | 0.99        | 0.133425    | 0.168792      | 201710       | 255178         |
| 3   | 0.8596 | 0.81        | 0.99        | 0.124111    | 0.148652      | 187630       | 224731         |
| 3   | 0.898  | 0.8646      | 0.998       | 0.21562     | 0.24351       | 325972       | 368136         |
| 3   | 0.82   | 0.76        | 0.998       | 0.10007     | 0.096698      | 151284       | 146188         |
| 3   | 0.89   | 0.85        | 0.99        | 0.259655    | 0.27825       | 392543       | 420656         |
| 3   | 0.724  | 0.73        | 0.99        | 0.112279    | 0.145761      | 169742       | 220360         |
| 3   | 0.9    | 0.885       | 0.998       | 0.158559    | 0.15743       | 239708       | 238001         |
| 3   | 0.85   | 0.77        | 0.99        | 0.089088    | 0.103886      | 134683       | 157054         |
| 3   | 0.88   | 0.894       | 0.993       | 0.623841    | 0.59302       | 943115       | 896522         |
| 4   | 0.92   | 0.89        | 0.99        | 0.190652    | 0.19368       | 288226       | 292803         |
| 4   | 0.79   | 0.82        | 0.99        | 0.082406    | 0.091186      | 124581       | 137855         |
| 4   | 0.906  | 0.924       | 0.997       | 0.32666     | 0.328832      | 493850       | 497125         |
| 4   | 0.91   | 0.89        | 0.998       | 0.2707      | 0.290958      | 409241       | 439865         |
| 4   | 0.92   | 0.944       | 0.996       | 0.312128    | 0.303971      | 471871       | 459541         |
| 4   | 0.869  | 0.827       | 0.998       | 0.2607      | 0.289561      | 394123       | 437755         |
| 4   | 0.83   | 0.773       | 0.99        | 0.056643    | 0.070907      | 85632        | 107197         |
| 4   | 0.893  | 0.849       | 0.99        | 0.133848    | 0.148482      | 202350       | 224474         |
